# Supplementary material
Source: PubMed Central journal article supplement (PMC3415554)
Supplement: mmc1.pdf [file mmc1.pdf]

## Supplemental Data

### Short Stature, Onychodysplasia, Facial Dysmorphism, and Hypotrichosis Syndrome Is Caused by a *POC1A* Mutation

Ofer Sarig, Sagi Nahum, Debora Rapaport, Akemi Ishida-Yamamoto, Dana Fuchs-Telem, Li Qiaoli, Ksenya Cohen-Katsenelson, Ronen Spiegel, Janna Nousbeck, Shirli Israeli, Zvi-Uri Borochowitz, Gilly Padalon-Brauch, Jouni Uitto, Mia Horowitz, Stavit Shalev, and Eli Sprecher

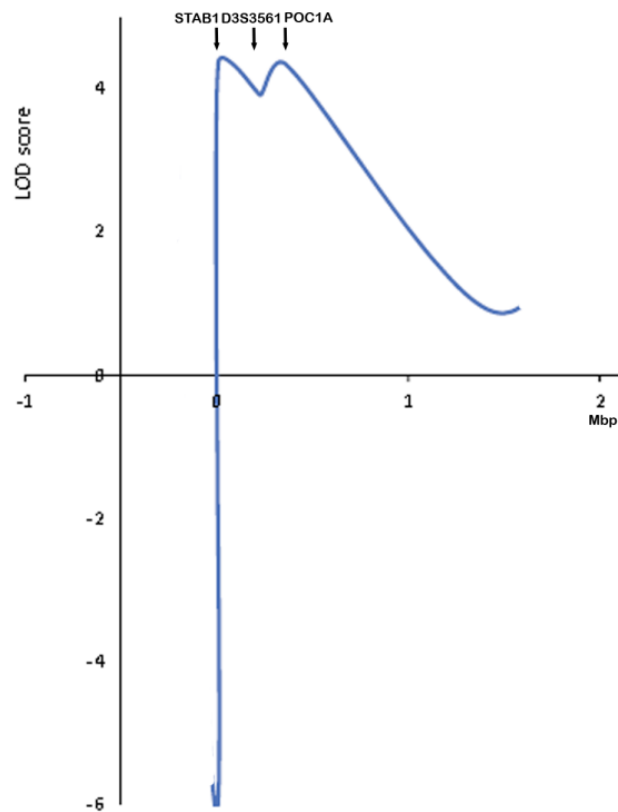

**Figure S1. Linkage Analysis**

LOD scores of the three highest ranked markers assessed are plotted against chromosomal locations.

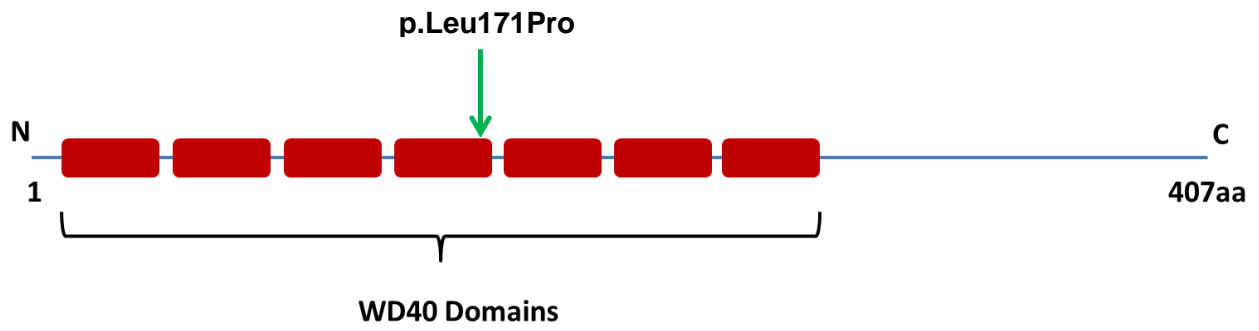

**Figure S2. Scheme of POC1A Structure**

The mutation position is marked by a green arrow.

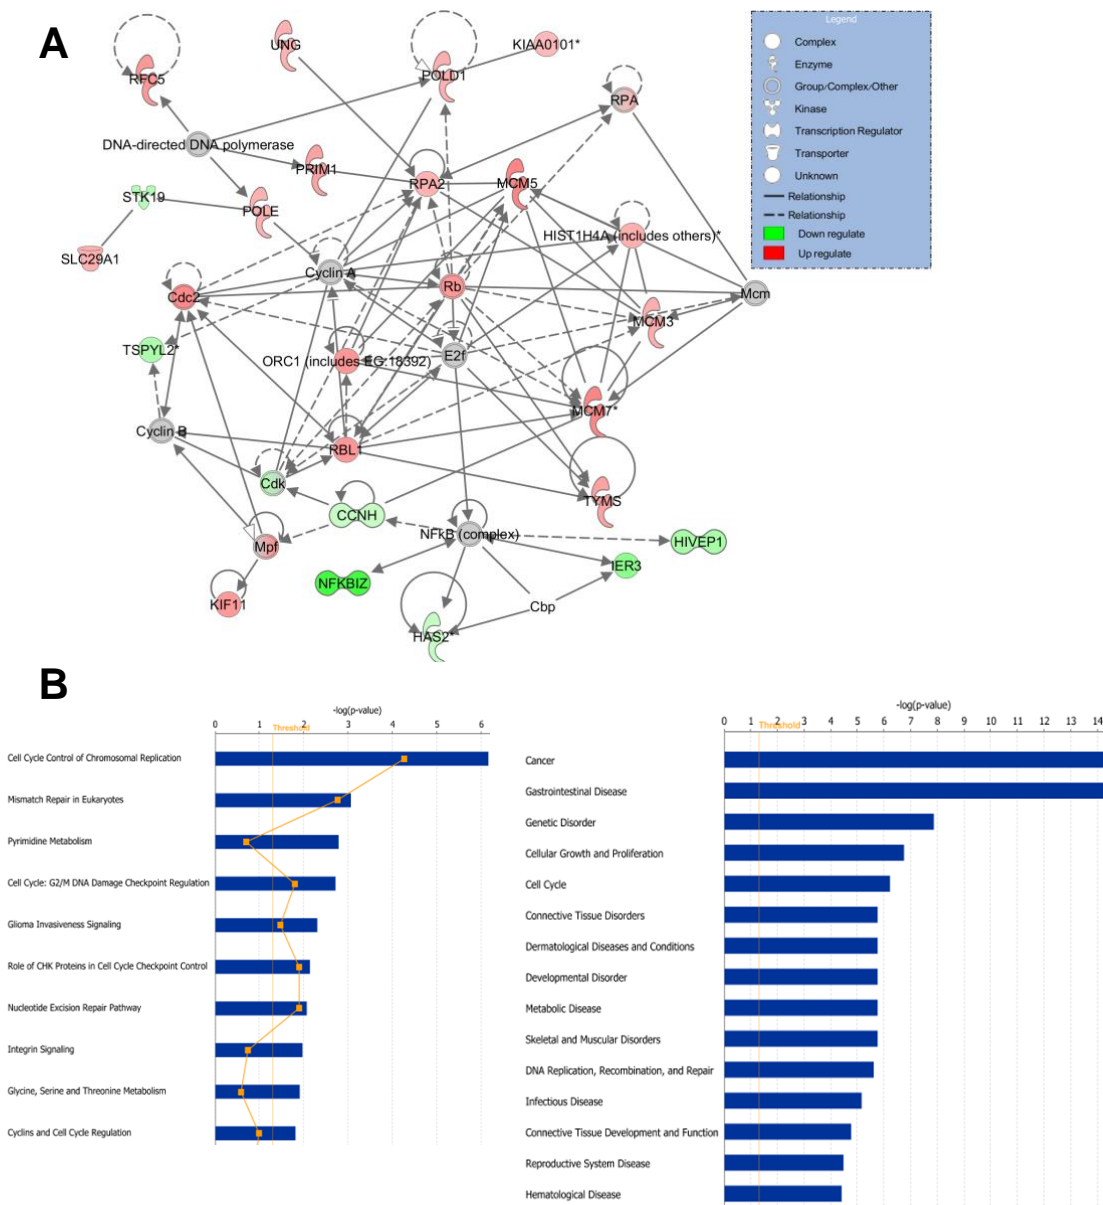

**Figure S3. Pathway Analysis**

To gain insight into the pathomechanisms underlying the deleterious effect of the SOFT syndrome-causing mutation, we compared transcription profiles of patient and control fibroblasts using the HumanHT-12 v3 Expression BeadChip Kit (Illumina). In brief, total RNA (200 ng) was reverse transcribed and cRNA prepared using TargetAmp-Nano Labeling Kit (Epicentre Biotechnologies, Madison, WI) according to the manufacturer's protocol. Biotinylated cRNA (1.5  $\mu$ g) was hybridized to HumanHT-12 v3 Expression BeadChip (encompassing more than 47,000 transcript targets), washed, and scanned on a BeadArray 500GX Reader using Illumina BeadScan image data acquisition software (version 2.3.0.13). Quality control and quantile normalization of the microarray data was done by BeadStudio 3.0 software (Illumina). The scanning data were exported to JMP genomic Software (SAS, Cary, NC), log transformed normalized, and transcripts with low expression (log value < 6.5) or with low variation across all samples (variation < 0.05) were removed from the analysis (more than 6900 transcripts passed the above criteria). Genes differentially expressed in patient's fibroblasts vs. normal control cells were ascertained using one way ANOVA analysis. A data set of 227 genes that were found to be significantly differentially expressed between patient and controls cells, each consisting of gene name, fold change in expression levels, and a *P* value for each of the genes, were imported into Ingenuity Pathway Analysis (IPA) software 5.0 (Ingenuity Systems, Redwood City, CA, USA). IPA revealed strong enrichment of biological networks and functions that are associated with cell cycle as well as connective tissue and dermatology disorders (*p* values < 0.0005, supplementary Figure 2S and Table 3S).

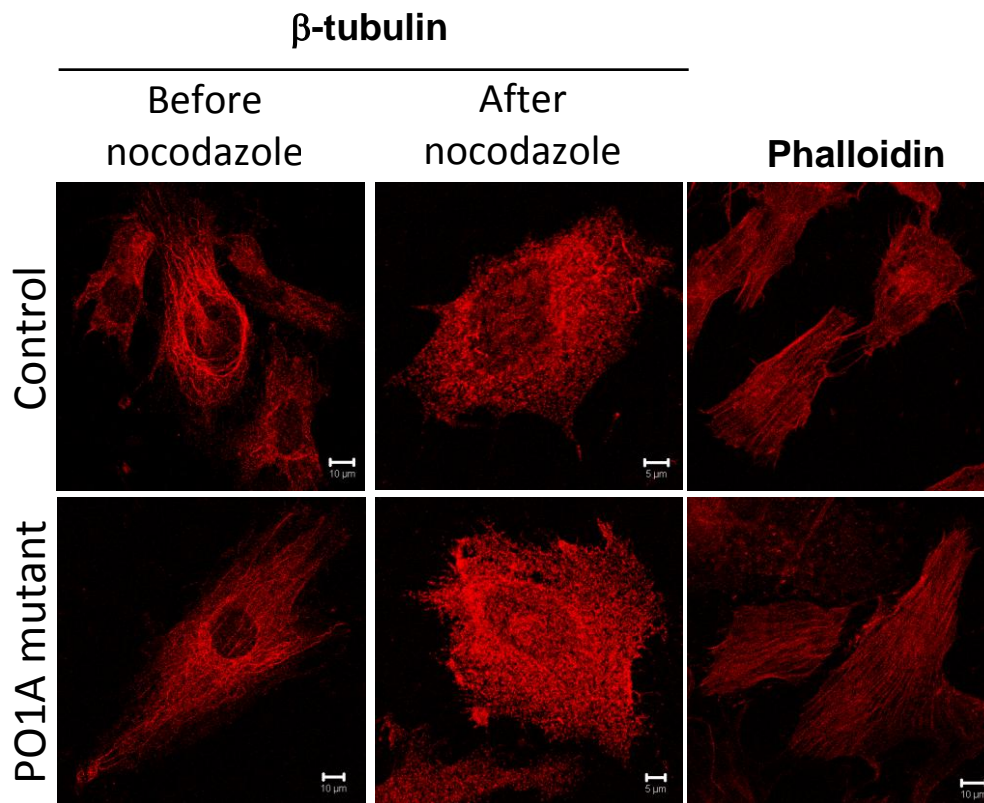

**Figure S4.  $\beta$ -Tubulin and Phalloidin Staining**

Normal and POC1A mutant fibroblasts were fixed and stained for  $\gamma$ -tubulin (microtubule cytoskeleton) before and after nocodazole washouts, and for F-actin (actin filaments) with phalloidin. No differences were noticed between patient and control cells (Bars, 5  $\mu$ m and 10  $\mu$ m).

**Table S1. Candidate Genes Sequenced in the Critical Interval (between Markers D3S1573 and rs2279323)**

| <b>Gene</b>     | <b>Location</b>  |
|-----------------|------------------|
| <i>RBM15B</i>   | 3p21.2           |
| <i>TEX264</i>   | 3p21.31          |
| <i>GPR62</i>    | 3p21.1           |
| <i>RPL29</i>    | 3p21.3-<br>p21.2 |
| <i>DUSP7</i>    | 3p21             |
| <i>PPM1M</i>    | 3p21.2           |
| <i>PHF7</i>     | 3p21.1           |
| <i>PBRM1</i>    | 3p21             |
| <i>GNL3</i>     | 3p21.1           |
| <i>SNORD19</i>  | 3p21.1           |
| <i>SNORD19B</i> | 3p21.1           |
| <i>SNORD69</i>  | 3p21.1           |
| <i>GLT8D1</i>   | 3p21.1           |
| <i>ITIH1</i>    | 3p21.1           |
| <i>ITIH3</i>    | 3p21.1           |
| <i>ITIH4</i>    | 3p21.1           |
| <i>MUSTN1</i>   | 3p21.1           |
| <i>PRKCD</i>    | 3p21.31          |
| <i>TKT</i>      | 3p14.3           |

**Table S2. Exome-Sequencing Details**

|                           | Actual Number | Percent |
|---------------------------|---------------|---------|
| Total sequence (bp)       | 6,560,365,680 | 100     |
| Aligned paired reads      | 61,319,857    | 85      |
| Median read depth         | X49           |         |
| 1× coverage <sup>a</sup>  | 193,479       | 99.2    |
| 4× coverage <sup>a</sup>  | 190,651       | 97.2    |
| 8× coverage <sup>a</sup>  | 186,523       | 95.7    |
| 20× coverage <sup>a</sup> | 168,232       | 86.3    |
| 30× coverage <sup>a</sup> | 146,406       | 75.1    |

<sup>a</sup> Coverage of exons in the genome (number of exons as defined by Nimblegen kit V2.0)

**Table S3. Predicted Pathogenicity of the p.Leu171Pro Substitution in POC1A**

| Prediction Software | Prediction category | Score                                                         |
|---------------------|---------------------|---------------------------------------------------------------|
| PolyPhen-2          | Score               | 0.999                                                         |
|                     | Sensitivity         | 0.14                                                          |
|                     | Specificity         | 0.99                                                          |
|                     | <b>Prediction</b>   | <b>Probably damaging substitution<sup>a</sup></b>             |
| SIFT                | Score               | 0.00                                                          |
|                     | <b>Prediction</b>   | <b>Probably damaging substitution<sup>b</sup></b>             |
| Align GVGD          | GV                  | 4.85                                                          |
|                     | GD                  | 95.38                                                         |
|                     | <b>Prediction</b>   | <b>Probably damaging substitution – Class C65<sup>c</sup></b> |

<sup>a</sup> Probably damaging (predicted to affect protein function with a high degree of confidence).

<sup>b</sup> Score range from 0 to 1. The amino acid substitution is predicted to be damaging if the score is less than 0.05 and tolerated if the score is above 0.05.

<sup>c</sup> Substitution classification in Align GVGD:  $GD \geq 65 + \tan(10) \times (GV^{2.5}) \Rightarrow$  Class C65  
 $\Leftrightarrow$  most likely.

**Table S4. Fold change of the Expression Level of Top 100 genes that Were Differentially Expressed between Cells Obtained from Patients vs. Controls**

| Gene             | MIM    | Fold Change | Description                                                                                    |
|------------------|--------|-------------|------------------------------------------------------------------------------------------------|
| <i>NTSR1</i>     | 162651 | 23.52       | neurotensin receptor 1 (high affinity)                                                         |
| <i>NPTX1</i>     | 602367 | 12.84       | neuronal pentraxin I                                                                           |
| <i>ST8SIA5</i>   | 607162 | 11.79       | ST8 alpha-N-acetyl-neuraminide alpha-2,8-sialyltransferase 5                                   |
| <i>GRP</i>       | 137260 | 10.09       | gastrin-releasing peptide                                                                      |
| <i>RPS4Y1</i>    | 470000 | 9.93        | ribosomal protein S4, Y-linked 1                                                               |
| <i>AQP1</i>      | 107776 | 7.70        | aquaporin 1 (Colton blood group)                                                               |
| <i>LOC404266</i> |        | 6.89        | hypothetical LOC404266                                                                         |
| <i>C13orf15</i>  | 610077 | 6.84        | chromosome 13 open reading frame 15                                                            |
| <i>NDP</i>       | 300658 | 6.33        | Norrie disease (pseudoglioma)                                                                  |
| <i>KCTD12</i>    | 610521 | 6.18        | potassium channel tetramerisation domain containing 12                                         |
| <i>EIF1AY</i>    | 400014 | 5.63        | eukaryotic translation initiation factor 1A, Y-linked                                          |
| <i>GSTM1</i>     | 138350 | 5.53        | glutathione S-transferase mu 1                                                                 |
| <i>ANGPTL4</i>   | 605910 | 4.80        | angiopoietin-like 4                                                                            |
| <i>HOXB5</i>     | 142960 | 4.60        | homeobox B5                                                                                    |
| <i>ST8SIA2</i>   | 602546 | 4.52        | ST8 alpha-N-acetyl-neuraminide alpha-2,8-sialyltransferase 2                                   |
| <i>THBS4</i>     | 600715 | 4.37        | thrombospondin 4                                                                               |
| <i>GPR68</i>     | 601404 | 4.26        | G protein-coupled receptor 68                                                                  |
| <i>OLFM1</i>     | 605366 | 4.22        | olfactomedin 1                                                                                 |
| <i>MMP1</i>      | 120353 | 4.22        | matrix metalloproteinase 1 (interstitial collagenase)                                          |
| <i>PPAPDC3</i>   |        | 4.13        | phosphatidic acid phosphatase type 2 domain containing 3                                       |
| <i>BTBD11</i>    |        | 4.02        | BTB (POZ) domain containing 11                                                                 |
| <i>FOXQ1</i>     | 612788 | 4.02        | forkhead box Q1                                                                                |
| <i>TBX1</i>      | 602054 | 3.99        | T-box 1                                                                                        |
| <i>CADPS</i>     | 604667 | 3.88        | Ca <sup>++</sup> -dependent secretion activator                                                |
| <i>KIAA1644</i>  |        | 3.86        | KIAA1644                                                                                       |
| <i>PTGS1</i>     | 176805 | 3.82        | prostaglandin-endoperoxide synthase 1 (prostaglandin G/H synthase and cyclooxygenase)          |
| <i>STC1</i>      | 601185 | 3.69        | stanniocalcin 1                                                                                |
| <i>CNIH3</i>     |        | 3.62        | cornichon homolog 3 (Drosophila)                                                               |
| <i>CLEC2B</i>    | 603242 | 3.60        | C-type lectin domain family 2, member B                                                        |
| <i>TNFAIP8L3</i> |        | 3.55        | tumor necrosis factor, alpha-induced protein 8-like 3                                          |
| <i>HOXB8</i>     | 142963 | 3.49        | homeobox B8                                                                                    |
| <i>SQSTM1</i>    | 601530 | 3.39        | sequestosome 1                                                                                 |
| <i>FILIP1L</i>   | 612993 | 3.40        | filamin A interacting protein 1-like                                                           |
| <i>RHOJ</i>      | 607653 | 3.40        | ras homolog gene family, member J                                                              |
| <i>OXTR</i>      | 167055 | 3.41        | oxytocin receptor                                                                              |
| <i>HERPUD1</i>   | 608070 | 3.43        | homocysteine-inducible, endoplasmic reticulum stress-inducible, ubiquitin-like domain member 1 |
| <i>DENND5B</i>   |        | 3.46        | DENN/MADD domain containing 5B                                                                 |
| <i>TSC22D3</i>   | 300506 | 3.48        | TSC22 domain family, member 3                                                                  |
| <i>ID3</i>       | 600277 | 3.55        | inhibitor of DNA binding 3, dominant negative helix-loop-helix protein                         |
| <i>DACT1</i>     | 607861 | 3.66        | dapper, antagonist of beta-catenin, homolog 1 ( <i>Xenopus laevis</i> )                        |
| <i>A2M</i>       | 103950 | 3.71        | alpha-2-macroglobulin                                                                          |

|                 |        |      |                                                                                       |
|-----------------|--------|------|---------------------------------------------------------------------------------------|
| <i>CHAC1</i>    |        | 3.72 | ChaC, cation transport regulator homolog 1 (E. coli)                                  |
| <i>PSG7</i>     | 176396 | 3.75 | pregnancy specific beta-1-glycoprotein 7 (gene/pseudogene)                            |
| <i>PDE1C</i>    | 602987 | 3.77 | phosphodiesterase 1C, calmodulin-dependent 70kDa                                      |
| <i>SLC7A5</i>   | 600182 | 3.77 | solute carrier family 7 (amino acid transporter light chain, L system), member 5      |
| <i>PRICKLE1</i> | 608500 | 3.80 | prickle homolog 1 (Drosophila)                                                        |
| <i>PRG1</i>     | 605157 | 3.82 | p53-responsive gene 1                                                                 |
| <i>EDIL3</i>    | 606018 | 3.85 | EGF-like repeats and discoidin I-like domains 3                                       |
| <i>ASS1</i>     | 603470 | 3.86 | argininosuccinate synthase 1                                                          |
| <i>COL4A2</i>   | 120090 | 3.87 | collagen, type IV, alpha 2                                                            |
| <i>MX1</i>      | 147150 | 3.91 | myxovirus (influenza virus) resistance 1, interferon-inducible protein p78 (mouse)    |
| <i>EFHD1</i>    | 611617 | 3.93 | EF-hand domain family, member D1                                                      |
| <i>TGM2</i>     | 190196 | 3.95 | transglutaminase 2 (C polypeptide, protein-glutamine-gamma-glutamyltransferase)       |
| <i>TCF21</i>    | 603306 | 3.95 | transcription factor 21                                                               |
| <i>TGFB2</i>    | 190220 | 4.00 | transforming growth factor, beta 2                                                    |
| <i>IFI44L</i>   | 613975 | 4.01 | interferon-induced protein 44-like                                                    |
| <i>DDIT3</i>    | 126337 | 4.03 | DNA-damage-inducible transcript 3                                                     |
| <i>ATF3</i>     | 603148 | 4.04 | activating transcription factor 3                                                     |
| <i>NFKBIZ</i>   | 608004 | 4.07 | nuclear factor of kappa light polypeptide gene enhancer in B-cells inhibitor, zeta    |
| <i>COL11A1</i>  | 120280 | 4.09 | collagen, type XI, alpha 1                                                            |
| <i>ADAMTS1</i>  | 605174 | 4.11 | ADAM metallopeptidase with thrombospondin type 1 motif, 1                             |
| <i>HOXD11</i>   | 142986 | 4.12 | homeobox D11                                                                          |
| <i>MECOM</i>    | 165215 | 4.17 | MDS1 and EVI1 complex locus                                                           |
| <i>RARB</i>     | 180220 | 4.25 | retinoic acid receptor, beta                                                          |
| <i>ADAMTS5</i>  | 605007 | 4.30 | ADAM metallopeptidase with thrombospondin type 1 motif, 5                             |
| <i>IFIT1</i>    | 147690 | 4.34 | interferon-induced protein with tetratricopeptide repeats 1                           |
| <i>TRIB3</i>    | 607898 | 4.47 | tribbles homolog 3 (Drosophila)                                                       |
| <i>IGFBP7</i>   | 602867 | 4.53 | insulin-like growth factor binding protein 7                                          |
| <i>EPSTI1</i>   | 607441 | 4.56 | epithelial stromal interaction 1 (breast)                                             |
| <i>MT1F</i>     | 156352 | 4.70 | metallothionein 1F                                                                    |
| <i>RAB27B</i>   | 603869 | 4.73 | RAB27B, member RAS oncogene family                                                    |
| <i>PTGS2</i>    | 600262 | 4.83 | prostaglandin-endoperoxide synthase 2 (prostaglandin G/H synthase and cyclooxygenase) |
| <i>KCNH1</i>    | 603305 | 4.90 | potassium voltage-gated channel, subfamily H (eag-related), member 1                  |
| <i>ADM2</i>     | 608682 | 4.97 | adrenomedullin 2                                                                      |
| <i>IFITM1</i>   | 604456 | 5.01 | interferon induced transmembrane protein 1                                            |
| <i>RNF150</i>   |        | 5.14 | ring finger protein 150                                                               |
| <i>CLDN1</i>    | 603718 | 5.15 | claudin 1                                                                             |
| <i>GDF15</i>    | 605312 | 5.22 | growth differentiation factor 15                                                      |
| <i>INHBE</i>    | 612031 | 5.30 | inhibin, beta E                                                                       |
| <i>CPA4</i>     | 607635 | 5.33 | carboxypeptidase A4                                                                   |
| <i>TUFT1</i>    | 600087 | 5.35 | tuftelin 1                                                                            |
| <i>CXCL1</i>    | 155730 | 5.38 | chemokine (C-X-C motif) ligand 1 (melanoma growth stimulating activity, alpha)        |
| <i>HAPLN1</i>   | 115435 | 5.60 | hyaluronan and proteoglycan link protein 1                                            |



|               |        |       |                                                                      |
|---------------|--------|-------|----------------------------------------------------------------------|
| <i>PAPPA</i>  | 176385 | 5.66  | pregnancy-associated plasma protein A, pappalysin 1                  |
| <i>IL8</i>    | 146930 | 6.23  | interleukin 8                                                        |
| <i>PSG4</i>   | 176393 | 6.34  | pregnancy specific beta-1-glycoprotein 4                             |
| <i>SULF1</i>  | 610012 | 6.53  | sulfatase 1                                                          |
| <i>LRRC17</i> |        | 6.75  | leucine rich repeat containing 17                                    |
| <i>COL4A5</i> | 303630 | 6.76  | collagen, type IV, alpha 5                                           |
| <i>AFF3</i>   | 601464 | 6.95  | AF4/FMR2 family, member 3                                            |
| <i>USMG5</i>  |        | 7.07  | up-regulated during skeletal muscle growth 5 homolog (mouse)         |
| <i>CH25H</i>  | 604551 | 7.22  | cholesterol 25-hydroxylase                                           |
| <i>PTX3</i>   | 602492 | 7.55  | pentraxin 3                                                          |
| <i>F2RL2</i>  | 601919 | 7.61  | coagulation factor II (thrombin) receptor-like 2                     |
| <i>KRT18</i>  | 148070 | 7.99  | keratin 18                                                           |
| <i>CXCL6</i>  | 138965 | 8.16  | chemokine (C-X-C motif) ligand 6 (granulocyte chemotactic protein 2) |
| <i>DDIT4</i>  | 607729 | 8.24  | DNA-damage-inducible transcript 4                                    |
| <i>COL4A1</i> | 120130 | 9.14  | collagen, type IV, alpha 1                                           |
| <i>EFEMP1</i> | 601548 | 36.39 | EGF containing fibulin-like extracellular matrix protein 1           |
| <i>FBN2</i>   | 612570 | 52.78 | fibrillin 2                                                          |

Upregulated and downregulated genes are highlighted with red and green colors, respectively. Data have been deposited through MIAMExpress.
